# Supplementary material for: The nature of the chemical bond in oxyanionic crystals based on QTAIM topological analysis of electron densities
Source: Royal Society of Chemistry journal article supplement (doi:10.1039/c9ra01403a), 2019-01-01
Supplement: c9ra01403a1.pdf [file c9ra01403a1.pdf]

**Supporting Information for:**  
**The Nature of Chemical Bond in Oxyanionic Crystals Based on QTAIM Topological Analysis of Electron Densities**

D. V. Korabel'nikov\*<sup>1</sup>, Yu. N. Zhuravlev

**Table S1.** Topological properties of electron density calculated at the BCPs for metal-oxygen and intra-anionic bonds in divalent metal nitrates

| Crystal                           | Bonds | $\rho_c$<br>(a.u.) | $\Delta\rho_c$<br>(a.u.) | $H_c$<br>(a.u.) |
|-----------------------------------|-------|--------------------|--------------------------|-----------------|
| Mg(NO <sub>3</sub> ) <sub>2</sub> | N-O   | 0.448              | -0.668                   | -0.809          |
|                                   | Mg-O  | 0.032              | 0.202                    | 0.008           |
| Ca(NO <sub>3</sub> ) <sub>2</sub> | N-O   | 0.446              | -0.643                   | -0.801          |
|                                   | Ca-O  | 0.024              | 0.103                    | 0.003           |
| Sr(NO <sub>3</sub> ) <sub>2</sub> | N-O   | 0.444              | -0.632                   | -0.795          |
|                                   | Sr-O  | 0.020              | 0.082                    | 0.003           |
| Ba(NO <sub>3</sub> ) <sub>2</sub> | N-O   | 0.442              | -0.622                   | -0.788          |
|                                   | Ba-O  | 0.019              | 0.068                    | 0.002           |
| Pb(NO <sub>3</sub> ) <sub>2</sub> | N-O   | 0.442              | -0.612                   | -0.787          |
|                                   | Pb-O  | 0.026              | 0.075                    | -0.0003         |
| Zn(NO <sub>3</sub> ) <sub>2</sub> | N-O   | 0.446              | -0.651                   | -0.802          |
|                                   | Zn-O  | 0.053              | 0.213                    | -0.0037         |

---

\* Corresponding author. Tel./fax: +73842 583195.  
E-mail address: dkorabelnikov@yandex.ru (D.V. Korabel'nikov)

**Table S2.** Topological properties of electron density calculated at the BCPs for metal-oxygen and intra-anionic bonds in divalent metal sulfates

| Crystal           | Bonds | $\rho_c$<br>(a.u.) | $\Delta\rho_c$<br>(a.u.) | $H_c$<br>(a.u.) |
|-------------------|-------|--------------------|--------------------------|-----------------|
| MgSO <sub>4</sub> | S-O1  | 0.264              | 1.085                    | -0.2215         |
|                   | S-O2  | 0.246              | 0.664                    | -0.2220         |
|                   | Mg-O1 | 0.039              | 0.264                    | 0.0091          |
|                   | Mg-O2 | 0.029              | 0.173                    | 0.0066          |
| CaSO <sub>4</sub> | S-O1  | 0.256              | 0.853                    | -0.2253         |
|                   | S-O2  | 0.255              | 0.863                    | -0.2225         |
|                   | Ca-O1 | 0.025              | 0.114                    | 0.0034          |
|                   | Ca-O2 | 0.032              | 0.162                    | 0.0042          |
| SrSO <sub>4</sub> | S-O1  | 0.261              | 1.027                    | -0.2205         |
|                   | S-O2  | 0.258              | 0.876                    | -0.2272         |
|                   | S-O3  | 0.251              | 0.746                    | -0.2246         |
|                   | Sr-O1 | 0.027              | 0.128                    | 0.0037          |
|                   | Sr-O2 | 0.022              | 0.096                    | 0.0030          |
|                   | Sr-O3 | 0.023              | 0.098                    | 0.0028          |
| BaSO <sub>4</sub> | S-O1  | 0.260              | 0.983                    | -0.2222         |
|                   | S-O2  | 0.256              | 0.857                    | -0.2249         |
|                   | S-O3  | 0.250              | 0.736                    | -0.2235         |
|                   | Ba-O1 | 0.021              | 0.087                    | 0.0027          |
|                   | Ba-O2 | 0.024              | 0.093                    | 0.0020          |
|                   | Ba-O3 | 0.025              | 0.092                    | 0.0015          |
| PbSO <sub>4</sub> | S-O1  | 0.262              | 1.015                    | -0.2234         |
|                   | S-O2  | 0.255              | 0.809                    | -0.2270         |
|                   | S-O3  | 0.249              | 0.689                    | -0.2255         |
|                   | Pb-O1 | 0.028              | 0.103                    | 0.0012          |
|                   | Pb-O2 | 0.035              | 0.120                    | -0.0008         |
|                   | Pb-O3 | 0.032              | 0.105                    | -0.0005         |
| ZnSO <sub>4</sub> | S-O1  | 0.254              | 0.809                    | -0.2251         |
|                   | S-O2  | 0.242              | 0.597                    | -0.2201         |
|                   | S-O3  | 0.259              | 0.977                    | -0.2207         |
|                   | Zn-O1 | 0.036              | 0.117                    | -0.0015         |
|                   | Zn-O2 | 0.055              | 0.229                    | -0.0038         |
|                   | Zn-O3 | 0.072              | 0.373                    | -0.0047         |

Atomic numbering is in accordance with Fig. 1.

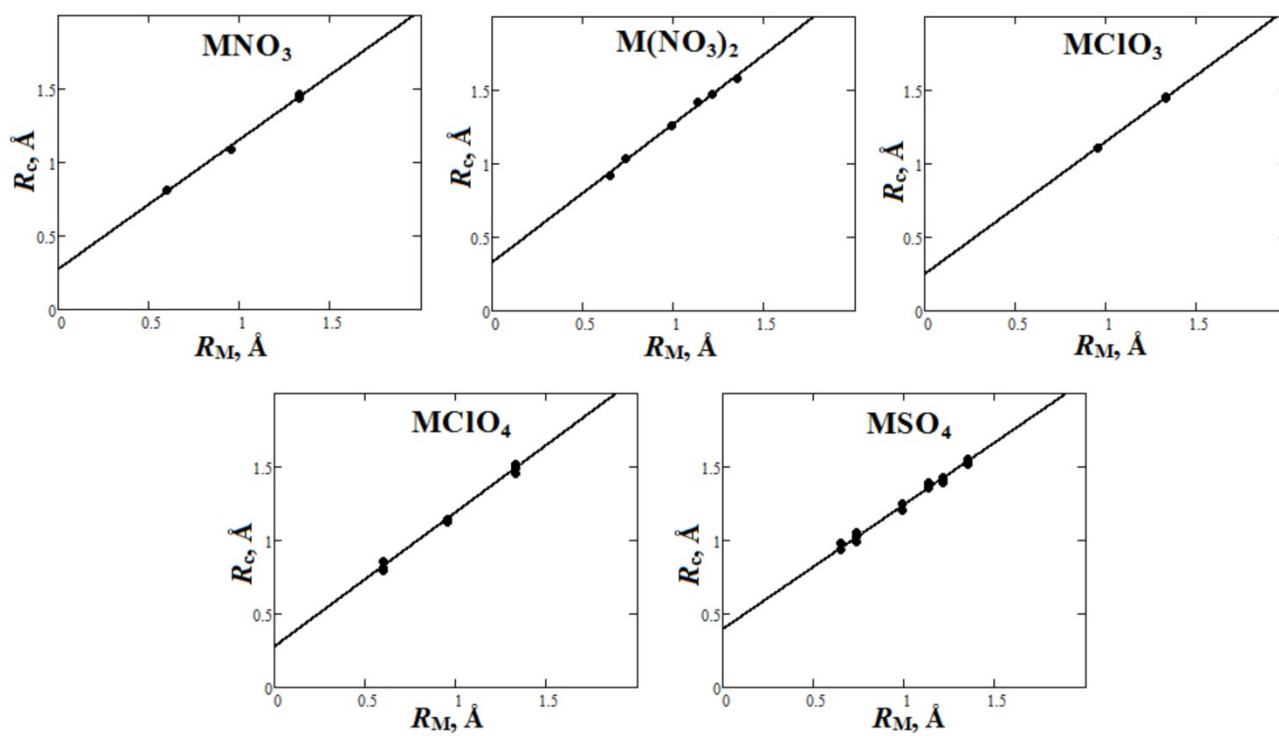

**Figure S1** The scatterplots for the linear correlations in oxyanionic crystals with metal cations
